# Supplementary material for: Leveraging Physiologically Based Modelling to Provide Insights on the Absorption of Paliperidone Extended-Release Formulation under Fed and Fasting Conditions
Source: MDPI journal article supplement (doi:10.3390/pharmaceutics15020629), 2023-02-13
Supplement: s1 [file s1]

# Leveraging Physiologically Based Modelling to Provide Insights on the Absorption of Paliperidone Extended Release Formulation under Fed and Fasting Conditions

## Supplementary Materials

Saima Subhani<sup>1,2</sup>, Viera Lucakova<sup>2</sup>, Chaejin Kim<sup>1</sup>, Leyanis Rodriguez-Vera<sup>1</sup>, Paula Muniz<sup>3</sup>, Monica Rodriguez<sup>3</sup>, Rodrigo Cristofolletti<sup>1</sup>, Sandra van Os<sup>4</sup>, Elena Suárez<sup>5</sup>, Stephan Schmidt<sup>1</sup>, Valvanera Vozmediano<sup>1\*</sup>

<sup>1</sup> Center for Pharmacometrics and System Pharmacology at Lake Nona (Orlando), Department of Pharmaceutics, College of Pharmacy, University of Florida, Orlando, FL, USA (S.S.), (C.K.), (L.R.V.), (R.C.), (St.S.), (V.V.)

<sup>2</sup> Simulations Plus, Lancaster, CA, USA (S.S.), (V.L.)

<sup>3</sup> Model Informed Development. CTI Laboratories Spain. , Derio, Bizkaia, Spain (P.M.), (M.R.)

<sup>4</sup> Synthon BV, Nijmegen, The Netherlands (S.O.)

<sup>5</sup> Department of Pharmacology, Pharmacokinetic, Nanotechnology and Gene Therapy Group (PharmaNanoGene), School of Medicine and Nursing, University of the Basque Country UPV/EHU, Biocruces Health Research Institute, Bizkaia, Spain. (E.S.)

**Funding:** This research received no external funding.

**Conflict of Interest:** Sandra van Os has no conflicts of interest other than being an employee of Synthon BV. Viera Lukacova has no conflicts of interest other than being an employee of Simulations Plus. All other authors declared no conflicts of interest directly relevant to the content of this manuscript.

### Corresponding Author

Valvanera Vozmediano, Ph. D  
Center for Pharmacometrics and System Pharmacology  
Department of Pharmaceutics, College of Pharmacy,  
University of Florida,  
6550 Sanger RD. Orlando, FL. 32827. US  
Phone: +1 407 313 7052  
Email: [valva@cop.ufl.edu](mailto:valva@cop.ufl.edu)

## Contents

### List of Tables

|                                                                                                                                                    |   |
|----------------------------------------------------------------------------------------------------------------------------------------------------|---|
| S1 Input parameters used to build the PBAM model in GastroPlus version 9.8 -----                                                                   | 2 |
| S2 Comparison of simulated versus observed average PK parameters and metrics of single simulation of the oral solution under fasted condition----- | 5 |
| S3 Verification of the PBAM model for the 2 mg PAL oral solution with external data from the literature-----                                       | 6 |

### List of Figures

|                                                                                                                                                                                                                                                                 |   |
|-----------------------------------------------------------------------------------------------------------------------------------------------------------------------------------------------------------------------------------------------------------------|---|
| S1 Predicted versus observed PAL plasma concentrations over time after the oral administration of 1 mg oral solution using the final model-----                                                                                                                 | 5 |
| S2 Parameters sensitivity analysis showing the effect of changes on different absorption-related parameters on a) the area under the curve (AUC), b) the fraction absorbed (Fa) and c) maximum plasma concentrations (Cmax)-----                                | 7 |
| S3 Simulation of the upper extreme scenario (i.e., maximum Weibull release fixed to 97% and colonic transit time fixed to 34 h) with the final model. Maximum exposure prediction with the model is not able to capture the subject with higher exposure) ----- | 8 |
| S4 External validation of OROS PAL. Predicted compared to observed PAL. (A) CMAX values, (B) AUC0-inf values from all literature studies-----                                                                                                                   | 9 |

**Table S1. Input parameters used to build the PBAM model in GastroPlus version 9.8**

| Parameter                                      | Value                                       | Source                                                      |
|------------------------------------------------|---------------------------------------------|-------------------------------------------------------------|
| Solubility at pH 6.8                           | 0.39 mg/mL                                  | [1]                                                         |
| Pka                                            | 2.6, 8.2                                    | [2]                                                         |
| SolFactor                                      | 302.4(Pka=2.6), 4.429<br>(Pka=8.2)          | Fitted to literature reported<br>solubility [1] vs pH curve |
| Log P                                          | 1.02                                        | [3]                                                         |
| Mean precipitation time                        | 900 sec                                     | GastroPlus version 9.8                                      |
| Diff. coefficient                              | 0.63 cm <sup>2</sup> /sec X 10 <sup>5</sup> | ADMET predictor 9.5                                         |
| Drug particle density                          | 1.2 g/ml                                    | ADMET predictor 9.5                                         |
| Caco-2 permeability<br>(Basolateral to Apical) | 30.9 cm/s X 10 <sup>-5</sup>                | [4]                                                         |
| Caco-2 permeability (Apical<br>to Basolateral) | 1.62 cm/s X 10 <sup>-5</sup>                | [4]                                                         |
| Caco-2 permeability<br>(Geometric Mean)        | 2.24 cm/s X 10 <sup>-5</sup>                | [4]                                                         |

**S1. Input parameters used to build the PBAM model in GastroPlus version 9.8  
(Continuation)**

|                                                 |                           |                                                                 |
|-------------------------------------------------|---------------------------|-----------------------------------------------------------------|
| Structure                                       | .sdf file of 2D structure | [3]                                                             |
| Molecular weight                                | 426.49 g/mol              | ADMET predictor 9.5                                             |
| Molecular Formula                               | C23H27FN4O3               | ADMET predictor 9.5                                             |
| C1 for fasted or fed model                      | 0.06944                   | Default<br>GastroPlus version 9.8 (Human Physiology Fasted/Fed) |
| C2 for fasted or fed model                      | 0.43028                   | Default<br>GastroPlus version 9.8 (Human Physiology Fasted/Fed) |
| C3 for fasted or fed model                      | 0.6                       | Fitted from 0.12147                                             |
| C4 for fasted or fed model                      | 0.8                       | Fitted from 0.46632                                             |
| Volume of fluid in small intestine (ACAT model) | 7.5%                      | Adjusted from 40% [5]                                           |
| Volume of fluid in colon (ACAT model)           | 2%                        | Adjusted from 10% [5]                                           |
| Renal Clearance (L/h/Kg)                        | 0.0428                    | [6]                                                             |
| FPE (%)                                         | 2.78                      | [6]                                                             |
| K12                                             | 0.36846                   | Estimated by 3- compartment fit                                 |
| K21                                             | 0.5136                    | Estimated by 3- compartment fit                                 |
| K13                                             | 0.01457                   | Estimated by 3- compartment fit                                 |
| K31                                             | 0.02098                   | Estimated by 3- compartment fit                                 |

**Table S2.** Comparison of simulated versus observed average PK parameters and metrics of single simulation of the oral solution under fasted condition

| Parameter                      | Simulated Values | Observed Values | %PE     |
|--------------------------------|------------------|-----------------|---------|
| Fa (%)                         | 99.888           | N.A             | N.A     |
| FDp (%)                        | 99.886           | N.A             | N.A     |
| F (%)                          | 97.102           | N.A             | N.A     |
| C <sub>max</sub> (ng/mL)       | 8.9655           | 8.5153          | 5.29%   |
| T <sub>max</sub> (h)           | 1.32             | 1.6102          | -18.02% |
| AUC <sub>0-inf</sub> (ng-h/mL) | 182.34           | 182.65          | -0.17%  |
| AUC <sub>0-t</sub> (ng-h/mL)   | 178.21           | 182.65          | -2.43%  |

Fa(%), FDp (%), F(%) represent fraction absorbed across the apical membrane of the enterocyte, fraction absorbed reaching the portal vein, fraction bioavailable respectively, expressed as percentage of dose ; N.A: Not available.

**Table S3.** Verification of the PBAM model for the 2 mg PAL oral solution with external data from the literature

| PK metrics (units)       | Reported values* | Simulated values | Prediction Error (%) |
|--------------------------|------------------|------------------|----------------------|
|                          | Mean (%CV)       | Mean (%CV)       |                      |
| C <sub>max</sub> (ng/ml) | 19.4 (34%)       | 17.5 (19.14)     | 9.79                 |
| T <sub>max</sub> (h)     | 1.2 (47%)        | 1.85 (31.42)     |                      |
| AUC (0-96h) (ng.h/ml)    | 371 (36%)        | 321.82 (11.68)   | 17.74                |
| AUC (0-inf) (ng.h/ml)    | 397 (36%)        | 305.19 (10.9)    | 18.94                |

\* patent-WO2007050377A1

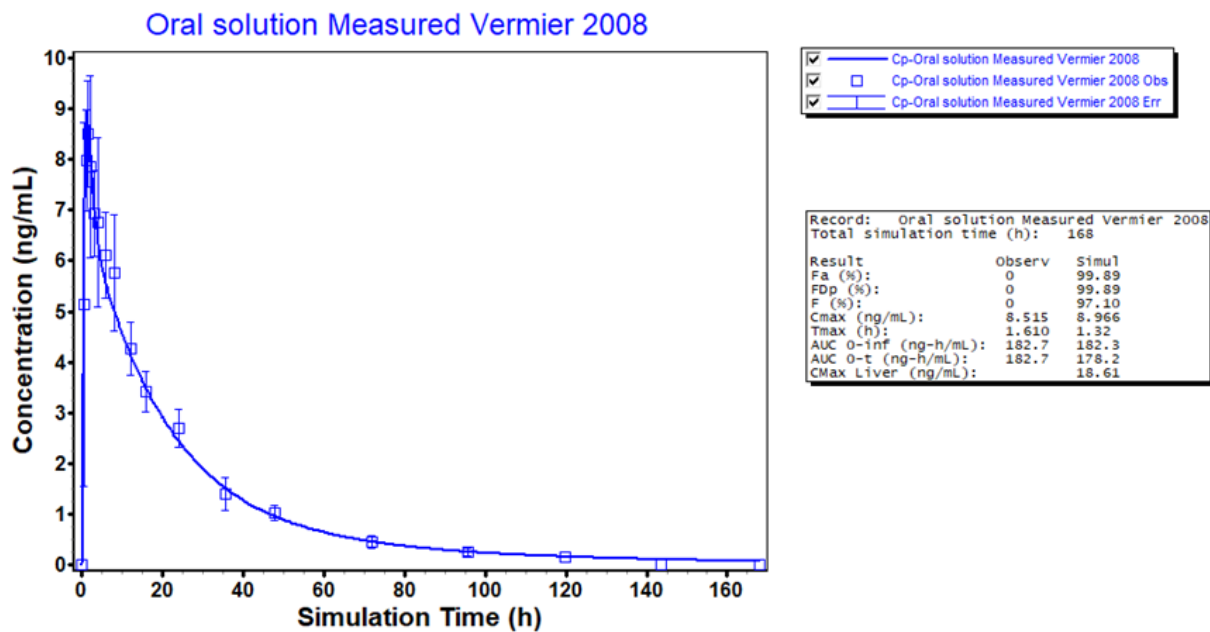

**Figure S1.** Predicted versus observed PAL plasma concentrations over time after the oral administration of 1 mg oral solution using the final model (blue solid line-predicted plasma concentration, blue square box with bars- observed mean plasma concentration in clinical fasted study  $\pm$  standard error).

A

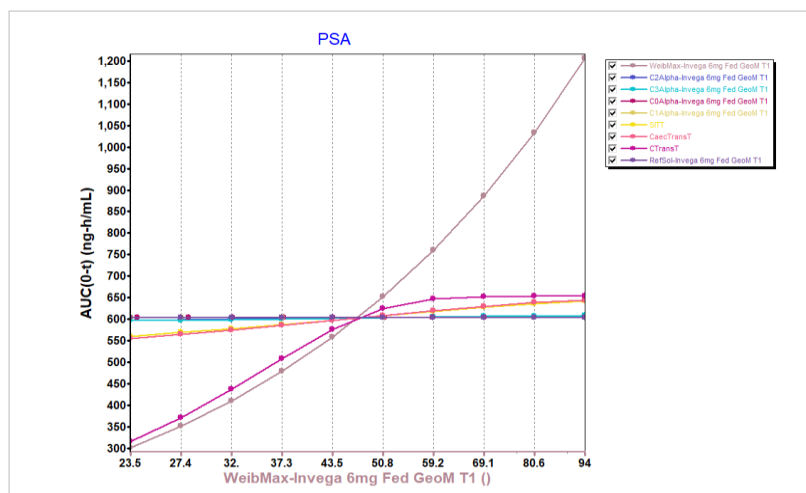

B

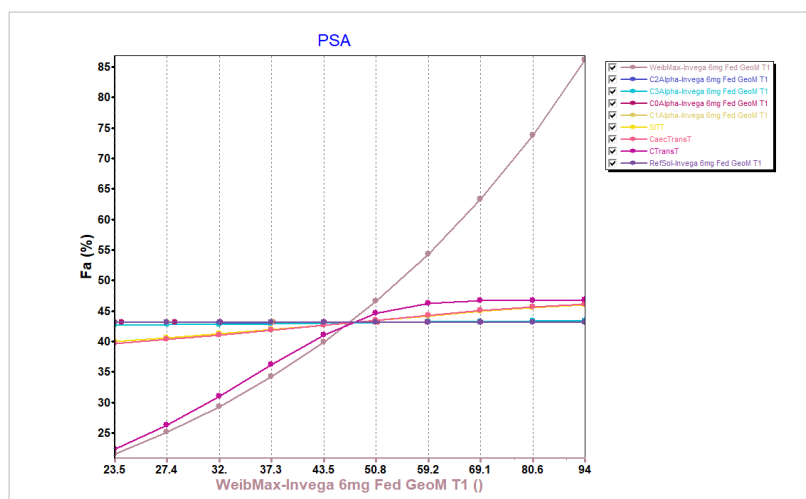

C

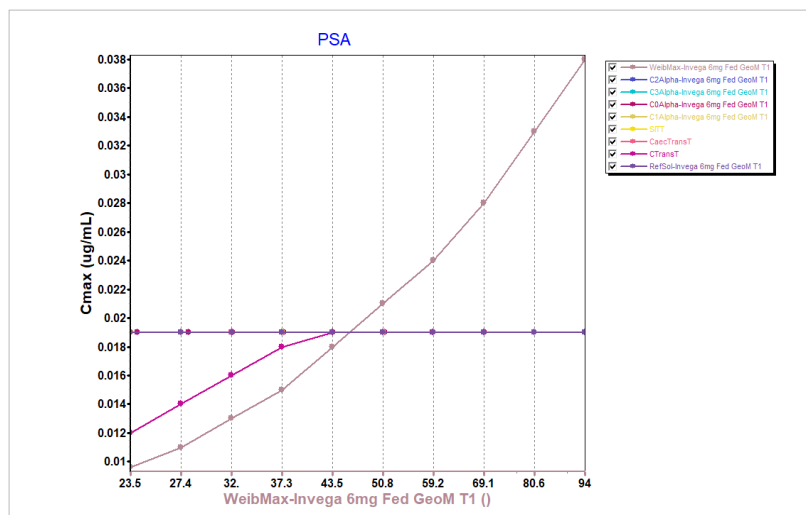

**Figure S2.** Parameters sensitivity analysis showing the effect of changes on different absorption-related parameters on A) the area under the curve (AUC), B) the fraction absorbed (Fa), and C) maximum plasma concentrations (Cmax).

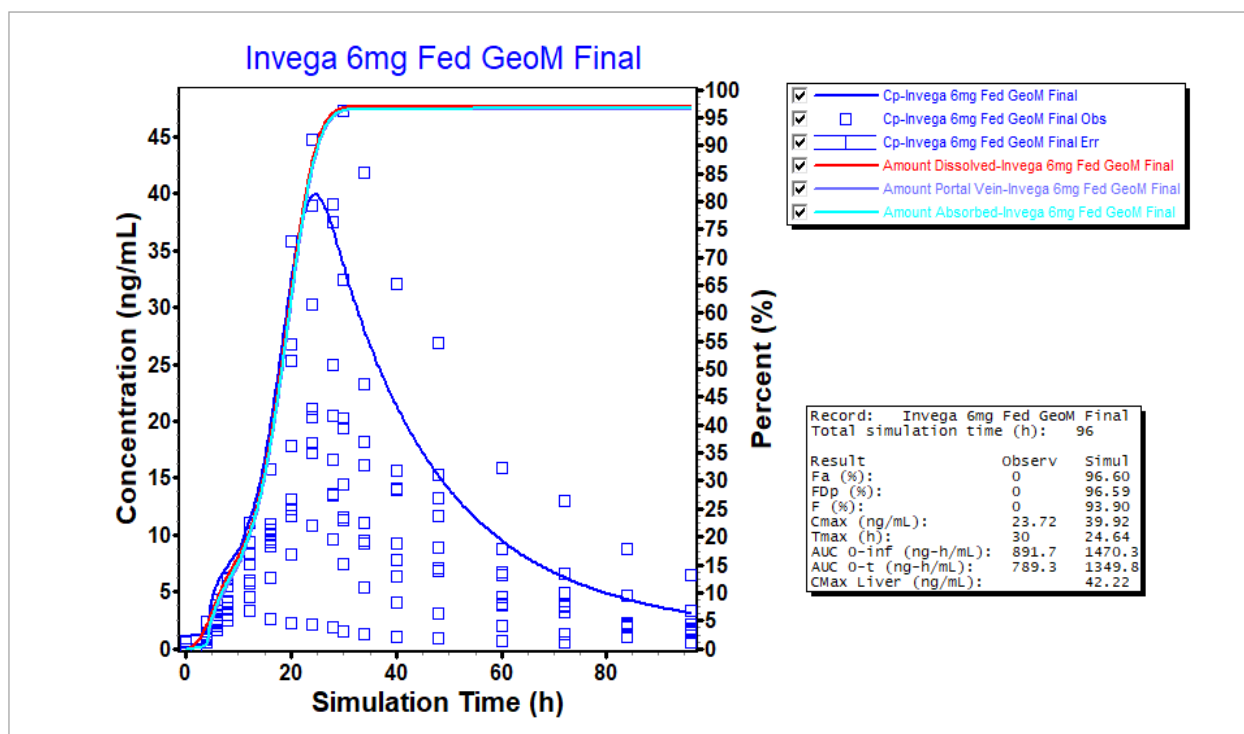

**Figure S3.** Simulation of the upper extreme scenario (i.e., maximum Weibull release fixed to 97% and colonic transit time fixed to 34 h) with the final model. Maximum exposure prediction with the model is not able to capture the subject with higher exposure.



A

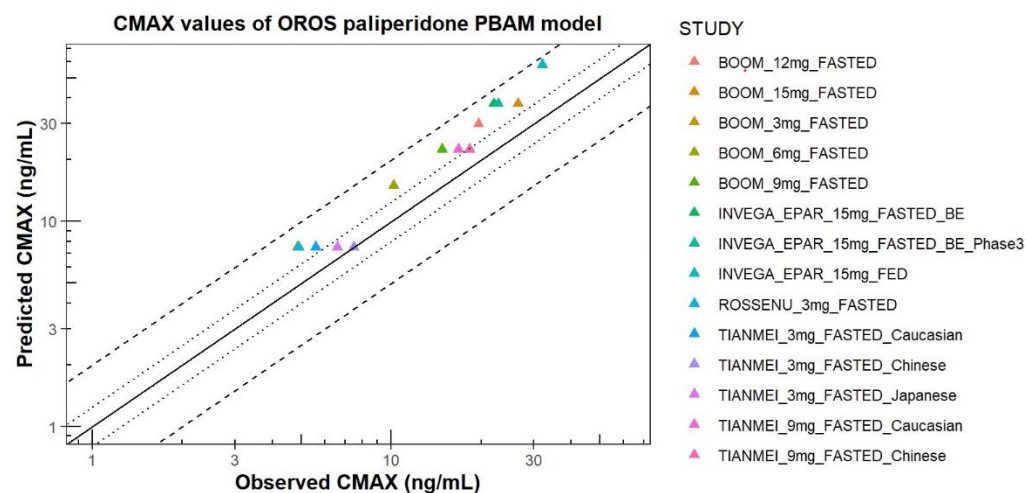

B

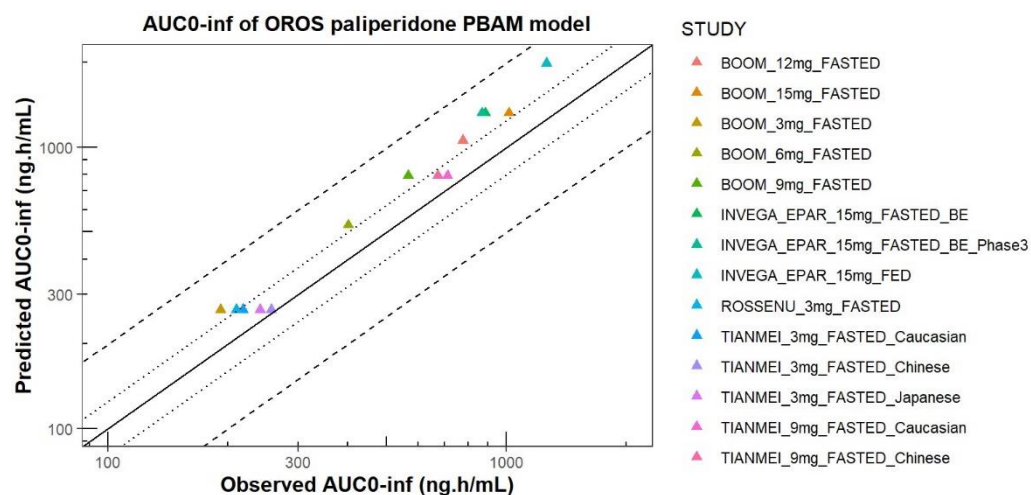

**Figure S4.** External validation of OROS PAL. Predicted compared to observed PAL. (A) C<sub>MAX</sub> values, (B) AUC<sub>0-inf</sub> values from all literature studies [7, 8, 9]. The line of identity is shown as a solid line; 1.25-fold deviation is shown as a dotted line; 2-fold deviation is shown as a dashed line. C<sub>MAX</sub>: maximum concentration; AUC: area under the curve.

## References

1. Prabhakar, D.; Divya, A.; Prathyusha, R.; Kumar, K.S. Augmentation of Dissolution Profile of Poorly Soluble Paliperidone by employing Liquisolid Technology. Available online: [https://sphinxesai.com/2014/PTVOL6/PT=39\(710-719\)AJ14.pdf](https://sphinxesai.com/2014/PTVOL6/PT=39(710-719)AJ14.pdf) (accessed on February 28th, 2022).
2. Product Monograph - Invega® paliperidone extended-release tablets ( 3 mg, 6 mg, 9 mg and 12 mg). Available online: [https://pdf.hres.ca/dpd\\_pm/00043904.PDF](https://pdf.hres.ca/dpd_pm/00043904.PDF) (accessed on 10 Jan 2019).
3. PubChem Compound Summary for CID 115237, Paliperidone. Available online: <https://pubchem.ncbi.nlm.nih.gov/compound/Paliperidone> (accessed on 10 Jan 2019).
4. FDA. Paliperidone-New Drug Application: Amendment-Clinical Pharmacology and biopharmaceutics review (Application No.21-999). **2006**.
5. Sutton, S.C. Role of physiological intestinal water in oral absorption. *AAPS J* **2009**, *11*, 277-285, doi:10.1208/s12248-009-9087-2.
6. Vermeir, M.; Naessens, I.; Remmerie, B.; Mannens, G.; Hendrickx, J.; Sterkens, P.; Talluri, K.; Boom, S.; Eerdeken, M.; van Osselaer, N.; et al. Absorption, metabolism, and excretion of paliperidone, a new monoaminergic antagonist, in humans. *Drug Metab Dispos* **2008**, *36*, 769-779, doi:10.1124/dmd.107.018275.
7. Rossenu, S.; Crauwels, H.; Cleton, A., et al. Comparison of the pharmacokinetics of an oral immediate-release and extended-release formulation of paliperidone in healthy subjects. Poster presented at: The Annual Meeting and Exposition of the American Association of Pharmaceutical Sciences (AAPS) **2006**; October 29-November 2,; San Antonio, TX.
8. Tianmai S, Liang S, Yi L, et al. Single-dose pharmacokinetics of paliperidone extended-release tablets in healthy Chinese subjects. *Hum Psychopharmacol* **2010**, *25*(5), 404-409.
9. Booms S, Talluri K, Janssens L, et al. Single- and multiple-dose pharmacokinetics and dose proportionality of the psychotropic agent paliperidone extended release. *J Clin Pharm* **2009**, *49*,1318-1330
